# Supplementary material for: Capturing the biological impact of CDKN2A and MC1R genes as an early predisposing event in melanoma and non melanoma skin cancer
Source: PubMed Central journal article supplement (PMC4039222; doi:10.18632/oncotarget.1444), 2013-12-16
Supplement: oncotarget-05-1439-s001.pdf [file oncotarget-05-1439-s001.pdf]

**Supplementary Material:**

**Table S1:** List of the most significant deregulated transcripts regarding *CDKN2A* status (p.G101W vs wild-type), adjusted P-value < 0.0001. Only genes identified in both *MC1R* wild-type and *MC1R* RHC variant carriers are included (N=108)

Abbreviations: FC: Fold Change; P-value: adjusted P-Value of such comparison; wt: wild-type.

\*Statistical values of mutant *CDKN2A* vs wild-type in *MC1R* RHC skin cells (individual A1 vs individual A2).

\*\*Statistical values of mutant *CDKN2A* vs wild-type in wild-type *MC1R* skin cells (individual B1 vs individual B2)

| Gene ID         | Gene Name         | FC in <i>MC1R</i> RHC * | P-value in <i>MC1R</i> RHC * | FC in wt <i>MC1R</i> ** | P-value in wt <i>MC1R</i> ** |
|-----------------|-------------------|-------------------------|------------------------------|-------------------------|------------------------------|
| NM_002121       | <i>HLA-DPB1</i>   | -4.83                   | 4.05E-13                     | -2.60                   | 5.79E-10                     |
| NM_005766       | <i>FARP1</i>      | -3.6                    | 1.32E-11                     | -1.53                   | 5.80E-07                     |
| NM_152270       | <i>SLFN11</i>     | -3.4                    | 1.87E-06                     | -2.08                   | 7.47E-07                     |
| NM_005110       | <i>GFPT2</i>      | -3.2                    | 5.49E-06                     | -2.50                   | 5.64E-05                     |
| NM_015719       | <i>COL5A3</i>     | -3.1                    | 1.87E-06                     | -2.28                   | 3.91E-05                     |
| NM_000550       | <i>TYRP1</i>      | -2.76                   | 1.43E-06                     | -2.34                   | 6.40E-06                     |
| NM_016269       | <i>LEF1</i>       | -2.69                   | 1.73E-09                     | -1.64                   | 6.46E-07                     |
| NM_000423       | <i>KRT2</i>       | -2.45                   | 7.93E-05                     | -2.70                   | 1.58E-05                     |
| NM_000304       | <i>PMP22</i>      | -2.41                   | 9.22E-10                     | -1.80                   | 3.50E-08                     |
| NM_152996       | <i>ST6GALNAC3</i> | -2.38                   | 1.38E-08                     | -1.44                   | 4.65E-06                     |
| NM_138284       | <i>IL17D</i>      | -2.31                   | 7.53E-06                     | -2.02                   | 2.08E-05                     |
| AF086044        | <i>unknown</i>    | -2.23                   | 1.74E-10                     | -3.42                   | 5.23E-13                     |
| NM_198951       | <i>TGM2</i>       | -2.08                   | 4.10E-06                     | -2.42                   | 4.33E-07                     |
| NM_138375       | <i>CABLES1</i>    | -2.08                   | 5.78E-09                     | -3.31                   | 8.92E-12                     |
| NM_006426       | <i>DPYSL4</i>     | -2.03                   | 3.01E-05                     | -3.92                   | 6.81E-09                     |
| NM_032048       | <i>EMILIN2</i>    | -1.83                   | 5.82E-06                     | -2.04                   | 1.00E-06                     |
| AK074473        | <i>unknown</i>    | -1.83                   | 6.09E-06                     | -2.43                   | 1.29E-07                     |
| NM_001129       | <i>AEBP1</i>      | -1.81                   | 2.43E-07                     | -1.40                   | 3.91E-06                     |
| NM_014070       | <i>unknown</i>    | -1.78                   | 2.71E-07                     | -1.31                   | 8.02E-06                     |
| BC004343        | <i>C21orf122</i>  | -1.66                   | 5.99E-06                     | -1.47                   | 1.48E-05                     |
| NM_148897       | <i>SDR9C7</i>     | -1.63                   | 3.91E-05                     | -1.83                   | 6.51E-06                     |
| AF131834        | <i>unknown</i>    | -1.53                   | 2.07E-06                     | -2.60                   | 1.81E-09                     |
| NM_080647       | <i>TBX1</i>       | -1.53                   | 4.46E-06                     | -1.21                   | 3.80E-05                     |
| NM_012131       | <i>CLDN17</i>     | -1.47                   | 4.17E-05                     | -1.79                   | 2.57E-06                     |
| NM_000635       | <i>RFX2</i>       | -1.38                   | 2.98E-06                     | -1.08                   | 2.98E-05                     |
| ENST00000224809 | <i>unknown</i>    | -1.28                   | 6.59E-06                     | -1.81                   | 6.37E-08                     |
| NM_032534       | <i>KRBA1</i>      | -1.21                   | 2.92E-06                     | -0.97                   | 2.25E-05                     |
| NM_152359       | <i>CPT1C</i>      | -1.08                   | 1.08E-05                     | -1.48                   | 1.50E-07                     |
| NM_001077263    | <i>TMPRSS13</i>   | -0.87                   | 4.43E-05                     | -2.81                   | 9.51E-12                     |
| NM_000396       | <i>CTSK</i>       | -0.74                   | 7.83E-05                     | -1.81                   | 1.05E-09                     |
| NM_003798       | <i>CTNNA1</i>     | 0.71                    | 6.15E-05                     | 0.81                    | 9.91E-06                     |
| NM_015920       | <i>RPS27L</i>     | 0.77                    | 4.43E-05                     | 0.86                    | 8.34E-06                     |
| NM_001015509    | <i>unknown</i>    | 0.79                    | 1.13E-05                     | 0.68                    | 3.46E-05                     |
| THC2657938      | <i>unknown</i>    | 0.81                    | 4.28E-05                     | 2.08                    | 2.37E-10                     |
| NM_000022       | <i>ADA</i>        | 0.87                    | 8.65E-06                     | 1.08                    | 3.92E-07                     |
| THC2698177      | <i>unknown</i>    | 0.89                    | 6.21E-05                     | 1.75                    | 1.38E-08                     |
| NM_005760       | <i>CEBPZ</i>      | 0.90                    | 3.14E-05                     | 2.20                    | 3.14E-10                     |
| NM_004346       | <i>CASP3</i>      | 0.91                    | 1.50E-05                     | 1.31                    | 1.23E-07                     |
| NM_004487       | <i>GOLGB1</i>     | 0.95                    | 5.49E-06                     | 1.17                    | 2.84E-07                     |
| BC027178        | <i>PRPF40A</i>    | 0.99                    | 8.74E-05                     | 2.62                    | 3.74E-10                     |
| NM_004280       | <i>EEF1E1</i>     | 1.00                    | 7.97E-05                     | 1.06                    | 2.48E-05                     |
| NM_004986       | <i>KTN1</i>       | 1.04                    | 2.90E-06                     | 2.53                    | 1.59E-11                     |
| ENST00000377156 | <i>unknown</i>    | 1.07                    | 1.97E-05                     | 1.09                    | 9.97E-06                     |
| NM_007047       | <i>BTN3A2</i>     | 1.09                    | 1.77E-05                     | 1.11                    | 9.31E-06                     |

|                 |          |      |          |      |          |
|-----------------|----------|------|----------|------|----------|
| NM_020169       | LXN      | 1.11 | 3.10E-05 | 1.97 | 1.97E-08 |
| ENST00000306024 | LSM3     | 1.12 | 2.45E-05 | 0.99 | 5.33E-05 |
| NM_001033719    | ZNF404   | 1.13 | 4.49E-05 | 2.13 | 1.58E-08 |
| NM_016010       | FAM164A  | 1.13 | 1.23E-05 | 0.99 | 3.29E-05 |
| NM_001007234    | unknown  | 1.15 | 1.63E-06 | 1.42 | 7.87E-08 |
| NM_001012334    | MDK      | 1.16 | 6.19E-05 | 1.20 | 2.48E-05 |
| NM_181453       | GCC2     | 1.19 | 6.48E-05 | 1.56 | 1.83E-06 |
| NM_033514       | LIMS3    | 1.20 | 8.85E-07 | 1.16 | 8.49E-07 |
| NM_033316       | MF12     | 1.20 | 9.60E-05 | 1.87 | 3.91E-07 |
| NM_002890       | RASA1    | 1.22 | 1.18E-06 | 0.86 | 3.86E-05 |
| NM_018300       | ZNF83    | 1.23 | 5.73E-05 | 1.70 | 8.63E-07 |
| NM_201612       | unknown  | 1.23 | 1.19E-05 | 2.28 | 4.38E-09 |
| NM_207014       | WDR78    | 1.30 | 6.81E-05 | 1.50 | 8.56E-06 |
| NM_002078       | GOLGA4   | 1.31 | 4.03E-05 | 1.21 | 5.59E-05 |
| AK075484        | SAMD4B   | 1.31 | 1.52E-05 | 3.52 | 3.01E-11 |
| NM_003566       | EEA1     | 1.33 | 9.48E-05 | 2.36 | 7.47E-08 |
| NM_144777       | SCEL     | 1.33 | 5.55E-07 | 1.01 | 9.54E-06 |
| CB050071        | unknown  | 1.41 | 5.52E-05 | 1.53 | 1.31E-05 |
| NM_022154       | SLC39A8  | 1.43 | 8.09E-05 | 1.54 | 2.19E-05 |
| CR603437        | unknown  | 1.44 | 1.33E-06 | 1.35 | 1.75E-06 |
| NM_018169       | C12orf35 | 1.48 | 2.17E-05 | 2.02 | 3.71E-07 |
| NM_207331       | unknown  | 1.49 | 9.36E-06 | 1.28 | 3.07E-05 |
| AB075826        | FAM171B  | 1.49 | 5.31E-05 | 1.47 | 3.83E-05 |
| NM_004510       | SP110    | 1.53 | 1.66E-07 | 0.94 | 3.63E-05 |
| NM_172174       | IL15     | 1.55 | 5.30E-08 | 1.29 | 4.08E-07 |
| NM_000888       | ITGB6    | 1.55 | 3.99E-05 | 2.52 | 8.05E-08 |
| NM_005059       | RLN2     | 1.58 | 1.97E-05 | 1.38 | 5.37E-05 |
| NM_025114       | CEP290   | 1.67 | 1.90E-05 | 2.70 | 3.88E-08 |
| AK096536        | unknown  | 1.70 | 3.16E-06 | 1.36 | 2.52E-05 |
| THC2683448      | unknown  | 1.72 | 2.01E-06 | 1.91 | 3.87E-07 |
| NM_001013728    | unknown  | 1.74 | 1.34E-05 | 2.23 | 4.47E-07 |
| BC029919        | unknown  | 1.78 | 4.62E-06 | 1.40 | 4.30E-05 |
| NM_001712       | CEACAM1  | 1.80 | 1.35E-06 | 1.56 | 4.49E-06 |
| NM_003020       | SCG5     | 1.83 | 2.10E-08 | 2.37 | 5.14E-10 |
| NM_004921       | unknown  | 1.86 | 8.41E-05 | 1.74 | 9.87E-05 |
| NM_018429       | BDP1     | 1.90 | 1.48E-05 | 2.05 | 3.60E-06 |
| THC2676635      | unknown  | 1.93 | 2.93E-08 | 1.27 | 3.49E-06 |
| NM_178445       | CCRL1    | 1.99 | 1.68E-05 | 1.98 | 1.08E-05 |
| THC2740317      | unknown  | 2.04 | 7.85E-06 | 1.75 | 2.63E-05 |
| NM_182762       | MACC1    | 2.05 | 5.66E-09 | 0.89 | 8.55E-05 |
| XR_015158       | unknown  | 2.15 | 6.40E-10 | 1.91 | 2.32E-09 |
| NM_001547       | IFIT2    | 2.16 | 4.68E-08 | 2.17 | 3.56E-08 |
| NM_152737       | RNF182   | 2.19 | 1.05E-05 | 1.78 | 5.97E-05 |
| NM_014314       | DDX58    | 2.22 | 3.99E-08 | 1.53 | 2.66E-06 |
| AK022351        | unknown  | 2.26 | 4.01E-05 | 2.74 | 2.66E-06 |
| THC2526509      | unknown  | 2.26 | 6.31E-08 | 1.19 | 7.99E-05 |
| NM_181501       | ITGA1    | 2.38 | 1.07E-08 | 1.09 | 8.38E-05 |
| NM_018284       | GBP3     | 2.40 | 1.80E-07 | 2.10 | 6.58E-07 |
| AI078143        | unknown  | 2.60 | 2.11E-07 | 1.52 | 7.46E-05 |
| THC2510656      | unknown  | 2.62 | 8.54E-06 | 2.91 | 1.51E-06 |
| THC2549494      | unknown  | 2.72 | 4.74E-06 | 2.48 | 8.65E-06 |
| NM_020124       | IFNK     | 2.74 | 7.98E-07 | 2.36 | 3.02E-06 |
| NM_152703       | SAMD9L   | 2.98 | 8.72E-06 | 2.94 | 6.15E-06 |
| NM_005532       | IFI27    | 3.03 | 3.42E-11 | 0.92 | 5.22E-05 |
| NM_017654       | SAMD9    | 3.04 | 1.08E-07 | 1.98 | 1.26E-05 |
| NM_006417       | IFI44    | 3.07 | 3.28E-12 | 2.71 | 7.74E-12 |
| THC2679528      | unknown  | 3.18 | 4.40E-07 | 2.89 | 9.26E-07 |
| AK023743        | unknown  | 3.18 | 1.52E-10 | 1.95 | 7.56E-08 |
| NM_001548       | IFIT1    | 3.28 | 6.99E-11 | 1.59 | 5.54E-07 |
| BF213738        | unknown  | 3.46 | 3.06E-11 | 1.34 | 2.66E-06 |
| NM_006820       | IFI44L   | 3.49 | 6.99E-11 | 2.28 | 1.49E-08 |
| D89479          | SULT1B1  | 3.56 | 1.70E-08 | 3.24 | 4.36E-08 |

|           |               |      |          |      |          |
|-----------|---------------|------|----------|------|----------|
| NM_005127 | <i>CLEC2B</i> | 3.66 | 1.61E-13 | 1.20 | 1.33E-07 |
| NM_017523 | <i>XAF1</i>   | 5.11 | 1.98E-08 | 3.00 | 9.40E-06 |

**Table S2:** List of the most significant deregulated transcripts regarding *MC1R* status (p.R106W and p.R151C vs wild-type) identified in both comparisons. Adjusted P-value < 0.0000001. Only genes identified in both analyses are included (N=159). Abbreviations: FC: Fold Change; P-value: adjusted P-Value of such comparison; wt: wild-type. \*Statistical values of *MC1R* RHC vs wild-type in mutant *CDKN2A* skin cell (individual A1 vs individual B1). \*\*Statistical values of *MC1R* RHC vs wild-type in wild-type *CDKN2A* skin cell (individual A2 vs individual B2).

| Gene ID         | Gene Name       | FC in mutant <i>CDKN2A</i> * | P-value in mutant <i>CDKN2A</i> * | FC in wt <i>CDKN2A</i> ** | P-value in wt <i>CDKN2A</i> ** |
|-----------------|-----------------|------------------------------|-----------------------------------|---------------------------|--------------------------------|
| NM_005672       | <i>PSCA</i>     | -7.30                        | 2.39E-12                          | -7.02                     | 1.20E-12                       |
| NM_000550       | <i>TYRP1</i>    | -7.24                        | 2.85E-12                          | -6.82                     | 2.14E-12                       |
| NM_000095       | <i>COMP</i>     | -6.79                        | 3.34E-13                          | -5.08                     | 2.95E-12                       |
| NM_005511       | <i>MLANA</i>    | -5.74                        | 2.51E-09                          | -6.96                     | 7.05E-11                       |
| NM_000372       | <i>TYR.TYRL</i> | -5.59                        | 1.29E-12                          | -7.19                     | 1.62E-14                       |
| NM_002443       | <i>MSMB</i>     | -5.30                        | 1.03E-14                          | -4.05                     | 1.47E-13                       |
| NM_006928       | <i>SILV</i>     | -4.79                        | 1.66E-08                          | -6.05                     | 3.02E-10                       |
| NM_000166       | <i>GJB1</i>     | -4.72                        | 2.43E-10                          | -2.76                     | 9.95E-08                       |
| NM_000014       | <i>A2M</i>      | -4.52                        | 3.06E-08                          | -7.21                     | 2.40E-11                       |
| NM_000698       | <i>ALOX5</i>    | -4.17                        | 3.63E-11                          | -2.19                     | 6.05E-08                       |
| NM_016190       | <i>CRNN</i>     | -4.14                        | 8.50E-10                          | -4.68                     | 5.89E-11                       |
| THC2711870      | <i>unknown</i>  | -3.98                        | 8.16E-09                          | -6.00                     | 1.27E-11                       |
| THC2675163      | <i>unknown</i>  | -3.73                        | 6.81E-12                          | -6.37                     | 5.96E-15                       |
| NM_032588       | <i>TRIM63</i>   | -3.70                        | 6.23E-10                          | -5.36                     | 1.70E-12                       |
| NM_004750       | <i>CRLF1</i>    | -3.70                        | 1.31E-10                          | -2.14                     | 6.30E-08                       |
| NM_013358       | <i>PADI1</i>    | -3.61                        | 1.08E-08                          | -4.16                     | 6.97E-10                       |
| ENST00000366930 | <i>TGFB2</i>    | -3.56                        | 3.31E-10                          | -2.27                     | 4.78E-08                       |
| NM_004864       | <i>GDF15</i>    | -3.31                        | 8.19E-11                          | -4.23                     | 1.09E-12                       |
| NM_020182       | <i>PMEPA1</i>   | -3.18                        | 2.39E-12                          | -1.98                     | 4.44E-10                       |
| NM_001712       | <i>CEACAM1</i>  | -3.12                        | 6.03E-10                          | -3.36                     | 7.97E-11                       |
| NM_005512       | <i>LRRC32</i>   | -3.11                        | 8.78E-08                          | -3.21                     | 2.37E-08                       |
| NM_144497       | <i>AKAP12</i>   | -3.10                        | 8.04E-08                          | -2.91                     | 7.23E-08                       |
| NM_130808       | <i>CPNE4</i>    | -2.97                        | 4.58E-09                          | -2.69                     | 6.33E-09                       |
| NM_001901       | <i>CTGF</i>     | -2.94                        | 9.98E-10                          | -4.13                     | 4.12E-12                       |
| NM_001039212    | <i>unknown</i>  | -2.87                        | 9.12E-11                          | -3.14                     | 9.05E-12                       |
| NM_024101       | <i>MLPH</i>     | -2.86                        | 1.13E-08                          | -4.17                     | 3.06E-11                       |
| ENST00000264554 | <i>SHC2</i>     | -2.80                        | 1.77E-08                          | -2.97                     | 3.32E-09                       |
| NM_000201       | <i>ICAM1</i>    | -2.75                        | 2.83E-09                          | -2.45                     | 4.99E-09                       |
| NM_000222       | <i>KIT</i>      | -2.75                        | 6.97E-09                          | -5.47                     | 3.15E-13                       |
| NM_201631       | <i>TGM5</i>     | -2.69                        | 6.67E-09                          | -2.57                     | 4.59E-09                       |
| NM_002193       | <i>INHBB</i>    | -2.61                        | 3.47E-10                          | -2.46                     | 2.87E-10                       |
| NM_001001547    | <i>CD36</i>     | -2.60                        | 1.37E-08                          | -2.58                     | 6.28E-09                       |
| NM_001945       | <i>HBEGF</i>    | -2.59                        | 4.84E-08                          | -2.56                     | 2.20E-08                       |
| NM_002463       | <i>MX2</i>      | -2.59                        | 2.72E-09                          | -5.66                     | 4.69E-14                       |
| NM_173198       | <i>NR4A3</i>    | -2.45                        | 2.44E-10                          | -4.42                     | 5.15E-14                       |
| NM_001343       | <i>DAB2</i>     | -2.42                        | 2.64E-08                          | -3.27                     | 1.92E-10                       |
| NM_138375       | <i>CABLES1</i>  | -2.23                        | 1.35E-09                          | -3.46                     | 1.49E-12                       |
| NM_001012964    | <i>KLK6</i>     | -2.19                        | 2.71E-09                          | -4.55                     | 8.27E-14                       |
| NM_016463       | <i>CXXC5</i>    | -2.10                        | 3.00E-08                          | -2.26                     | 4.70E-09                       |
| NM_001453       | <i>FOXC1</i>    | -1.94                        | 1.02E-09                          | -1.72                     | 2.04E-09                       |
| NM_003793       | <i>CTSF</i>     | -1.92                        | 4.54E-08                          | -3.15                     | 2.38E-11                       |
| NM_022910       | <i>NDRG4</i>    | -1.84                        | 9.53E-09                          | -1.55                     | 3.44E-08                       |
| NM_006989       | <i>RASA4</i>    | -1.67                        | 7.49E-08                          | -2.15                     | 1.08E-09                       |
| NM_145804       | <i>ABTB2</i>    | -1.45                        | 7.91E-08                          | -2.40                     | 3.58E-11                       |

|                 |                  |       |          |       |          |
|-----------------|------------------|-------|----------|-------|----------|
| NM_003565       | <i>ULK1</i>      | -1.39 | 7.35E-08 | -1.75 | 1.36E-09 |
| NM_030912       | <i>TRIM8</i>     | -1.25 | 5.80E-08 | -1.13 | 8.84E-08 |
| NM_206836       | <i>PECI</i>      | 1.33  | 6.12E-08 | 1.23  | 6.13E-08 |
| NM_005915       | <i>MCM6</i>      | 1.33  | 9.39E-08 | 1.69  | 1.62E-09 |
| AY163812        | <i>C17orf80</i>  | 1.34  | 6.62E-08 | 1.47  | 7.72E-09 |
| CR600585        | <i>unknown</i>   | 1.45  | 8.28E-09 | 1.35  | 7.88E-09 |
| NM_033514       | <i>LIMS3</i>     | 1.46  | 3.69E-08 | 1.42  | 2.13E-08 |
| NM_016126       | <i>HSPB11</i>    | 1.47  | 6.42E-08 | 1.48  | 2.29E-08 |
| NM_001079525    | <i>PAICS</i>     | 1.50  | 1.12E-08 | 2.03  | 7.45E-11 |
| NM_016448       | <i>DTL</i>       | 1.53  | 5.00E-09 | 1.85  | 1.41E-10 |
| NM_003579       | <i>RAD54L</i>    | 1.54  | 6.67E-09 | 1.87  | 1.86E-10 |
| NM_032636       | <i>PSRC1</i>     | 1.59  | 5.94E-08 | 1.67  | 1.21E-08 |
| NM_033417       | <i>HAUS8</i>     | 1.59  | 6.77E-08 | 1.71  | 1.05E-08 |
| NM_018455       | <i>CENPN</i>     | 1.61  | 2.25E-08 | 2.40  | 4.13E-11 |
| NM_030771       | <i>CCDC34</i>    | 1.64  | 3.02E-09 | 3.26  | 1.47E-13 |
| NM_017868       | <i>TTC12</i>     | 1.67  | 7.74E-10 | 2.18  | 7.74E-12 |
| NM_003258       | <i>TK1</i>       | 1.72  | 8.63E-08 | 1.83  | 1.53E-08 |
| NM_003504       | <i>CDC45L</i>    | 1.75  | 6.55E-09 | 1.99  | 4.57E-10 |
| NM_002916       | <i>RFC4</i>      | 1.76  | 1.32E-09 | 2.19  | 2.50E-11 |
| ENST00000367003 | <i>C1orf97</i>   | 1.77  | 2.25E-08 | 2.65  | 4.11E-11 |
| NM_145231       | <i>C14orf143</i> | 1.84  | 1.04E-08 | 1.86  | 3.46E-09 |
| NM_003798       | <i>CTNNAL1</i>   | 1.85  | 2.44E-10 | 1.94  | 4.44E-11 |
| NM_014317       | <i>PDSS1</i>     | 1.86  | 3.58E-08 | 2.19  | 1.71E-09 |
| NM_004219       | <i>PTTG1</i>     | 1.87  | 9.03E-09 | 1.92  | 2.48E-09 |
| NM_001159       | <i>AOX1</i>      | 1.87  | 8.16E-09 | 2.23  | 3.05E-10 |
| NM_018186       | <i>C1orf112</i>  | 1.94  | 5.99E-09 | 1.94  | 2.12E-09 |
| NM_001826       | <i>CKS1B</i>     | 1.96  | 5.59E-09 | 2.00  | 1.55E-09 |
| BX640843        | <i>unknown</i>   | 1.99  | 5.94E-09 | 2.51  | 9.73E-11 |
| NM_182620       | <i>FAM33A</i>    | 2.01  | 1.76E-09 | 1.72  | 5.18E-09 |
| NM_003686       | <i>EXO1</i>      | 2.01  | 2.93E-10 | 2.19  | 3.22E-11 |
| NM_004282       | <i>BAG2</i>      | 2.02  | 9.45E-10 | 2.61  | 1.14E-11 |
| NM_014051       | <i>TMEM14A</i>   | 2.09  | 1.45E-08 | 2.14  | 4.46E-09 |
| NM_016095       | <i>GINS2</i>     | 2.12  | 7.82E-10 | 2.14  | 2.35E-10 |
| NM_145014       | <i>HYLS1</i>     | 2.13  | 5.04E-08 | 2.66  | 1.08E-09 |
| NM_024037       | <i>C1orf135</i>  | 2.13  | 8.41E-10 | 2.22  | 1.78E-10 |
| NM_003384       | <i>VRK1</i>      | 2.15  | 6.03E-10 | 2.37  | 5.77E-11 |
| BC040051        | <i>unknown</i>   | 2.15  | 5.79E-08 | 2.00  | 5.83E-08 |
| NM_001254       | <i>CDC6</i>      | 2.20  | 8.16E-08 | 2.57  | 4.42E-09 |
| NM_014176       | <i>UBE2T</i>     | 2.23  | 1.12E-11 | 2.18  | 5.39E-12 |
| NM_203467       | <i>PPIL5</i>     | 2.23  | 9.58E-10 | 1.82  | 5.22E-09 |
| NM_000057       | <i>BLM</i>       | 2.26  | 7.59E-08 | 2.85  | 1.45E-09 |
| NM_024808       | <i>C13orf34</i>  | 2.27  | 8.38E-08 | 2.54  | 7.74E-09 |
| NM_006607       | <i>PTTG2</i>     | 2.27  | 2.24E-10 | 1.92  | 7.20E-10 |
| NM_001928       | <i>CFD</i>       | 2.30  | 3.69E-08 | 2.45  | 6.65E-09 |
| NM_015895       | <i>GMNN</i>      | 2.31  | 1.29E-10 | 1.77  | 1.51E-09 |
| NM_018101       | <i>CDCA8</i>     | 2.34  | 7.82E-10 | 2.36  | 2.52E-10 |
| AK027541        | <i>unknown</i>   | 2.35  | 2.05E-08 | 2.34  | 8.84E-09 |
| NM_001766       | <i>CD1D</i>      | 2.36  | 6.03E-09 | 2.53  | 9.33E-10 |
| NM_002876       | <i>RAD51C</i>    | 2.37  | 4.47E-10 | 2.20  | 4.50E-10 |
| NM_000946       | <i>PRIM1</i>     | 2.38  | 2.14E-09 | 2.22  | 1.94E-09 |
| NM_005030       | <i>PLK1</i>      | 2.40  | 8.38E-08 | 2.41  | 3.33E-08 |
| NM_031299       | <i>CDCA3</i>     | 2.41  | 2.46E-09 | 2.09  | 6.11E-09 |
| NM_012415       | <i>RAD54B</i>    | 2.43  | 6.39E-08 | 2.34  | 4.24E-08 |
| NM_006479       | <i>RAD51AP1</i>  | 2.46  | 3.02E-08 | 3.80  | 3.48E-11 |
| NM_138555       | <i>KIF23</i>     | 2.48  | 8.16E-09 | 2.87  | 4.69E-10 |
| NM_018193       | <i>FANCI</i>     | 2.50  | 4.23E-11 | 2.38  | 2.70E-11 |
| NM_014791       | <i>MELK</i>      | 2.50  | 1.91E-09 | 2.50  | 7.39E-10 |
| NM_175617       | <i>MT1E</i>      | 2.52  | 6.20E-10 | 2.12  | 2.36E-09 |
| NM_012177       | <i>FBXO5</i>     | 2.54  | 1.32E-09 | 2.45  | 8.26E-10 |
| NM_001012271    | <i>BIRC5</i>     | 2.55  | 9.58E-10 | 2.63  | 2.35E-10 |
| NM_001012267    | <i>CENPP</i>     | 2.56  | 2.85E-12 | 1.76  | 1.78E-10 |
| NM_001827       | <i>CKS2</i>      | 2.57  | 1.36E-10 | 2.22  | 3.37E-10 |

|              |                 |      |          |      |          |
|--------------|-----------------|------|----------|------|----------|
| BC044246     | <i>TMEM200A</i> | 2.57 | 7.02E-09 | 2.04 | 5.61E-08 |
| NM_012310    | <i>KIF4A</i>    | 2.57 | 3.81E-09 | 2.48 | 2.30E-09 |
| NM_199420    | <i>POLQ</i>     | 2.58 | 6.02E-08 | 3.45 | 5.20E-10 |
| NM_001274    | <i>CHEK1</i>    | 2.58 | 1.29E-10 | 3.00 | 5.77E-12 |
| NM_001005414 | <i>unknown</i>  | 2.62 | 6.03E-10 | 1.95 | 1.10E-08 |
| NM_182751    | <i>MCM10</i>    | 2.62 | 2.54E-08 | 3.10 | 1.09E-09 |
| NM_001010897 | <i>SERP2</i>    | 2.65 | 3.23E-09 | 2.27 | 9.59E-09 |
| NM_001034    | <i>RRM2</i>     | 2.67 | 1.05E-08 | 2.47 | 1.16E-08 |
| NM_145018    | <i>C11orf82</i> | 2.71 | 1.68E-10 | 2.95 | 1.85E-11 |
| NM_031966    | <i>CCNB1</i>    | 2.74 | 2.63E-11 | 2.84 | 5.39E-12 |
| NM_005059    | <i>RLN2</i>     | 2.78 | 9.81E-09 | 2.58 | 1.05E-08 |
| NM_006845    | <i>KIF2C</i>    | 2.80 | 1.74E-09 | 2.78 | 7.12E-10 |
| NM_001211    | <i>BUB1B</i>    | 2.81 | 4.88E-08 | 3.45 | 1.32E-09 |
| NM_198433    | <i>AURKA</i>    | 2.85 | 1.71E-08 | 2.81 | 8.31E-09 |
| NM_004701    | <i>CCNB2</i>    | 2.92 | 2.85E-12 | 3.11 | 5.71E-13 |
| NM_020242    | <i>KIF15</i>    | 2.93 | 5.10E-09 | 4.62 | 4.38E-12 |
| NM_004523    | <i>KIF11</i>    | 2.96 | 1.80E-08 | 3.18 | 2.81E-09 |
| NM_001255    | <i>CDC20</i>    | 3.05 | 4.70E-09 | 2.92 | 3.13E-09 |
| BC013418     | <i>C13orf3</i>  | 3.10 | 3.10E-09 | 3.42 | 3.24E-10 |
| AL834537     | <i>CCDC150</i>  | 3.11 | 3.65E-08 | 4.61 | 7.45E-11 |
| NM_004336    | <i>BUB1</i>     | 3.13 | 2.15E-10 | 3.42 | 2.35E-11 |
| NM_004117    | <i>FKBP5</i>    | 3.14 | 4.53E-08 | 3.43 | 5.67E-09 |
| NM_052913    | <i>TMEM200A</i> | 3.14 | 8.40E-08 | 2.96 | 7.23E-08 |
| NM_001067    | <i>TOP2A</i>    | 3.14 | 9.65E-11 | 3.93 | 1.70E-12 |
| NM_005733    | <i>KIF20A</i>   | 3.15 | 1.78E-11 | 2.96 | 1.38E-11 |
| NM_001813    | <i>CENPE</i>    | 3.18 | 6.03E-10 | 4.69 | 1.24E-12 |
| NM_152515    | <i>CKAP2L</i>   | 3.18 | 8.97E-08 | 3.74 | 4.49E-09 |
| NM_001237    | <i>CCNA2</i>    | 3.19 | 2.93E-10 | 3.25 | 8.24E-11 |
| NM_018136    | <i>ASPM</i>     | 3.20 | 1.92E-09 | 3.55 | 1.78E-10 |
| NM_007280    | <i>OIP5</i>     | 3.21 | 1.51E-11 | 2.87 | 2.37E-11 |
| NM_138419    | <i>FAM54A</i>   | 3.23 | 3.04E-11 | 3.07 | 2.01E-11 |
| NM_020675    | <i>SPC25</i>    | 3.26 | 1.59E-12 | 3.45 | 1.87E-13 |
| NM_018492    | <i>PBK</i>      | 3.28 | 3.26E-09 | 3.95 | 9.92E-11 |
| NM_022346    | <i>NCAPG</i>    | 3.29 | 5.95E-13 | 3.50 | 7.81E-14 |
| NM_024094    | <i>DSCC1</i>    | 3.31 | 3.47E-10 | 3.99 | 1.02E-11 |
| NM_032117    | <i>MND1</i>     | 3.35 | 6.71E-12 | 3.77 | 5.71E-13 |
| NM_001809    | <i>CENPA</i>    | 3.38 | 7.61E-11 | 3.90 | 3.72E-12 |
| NM_001786    | <i>CDC2</i>     | 3.38 | 2.39E-12 | 3.27 | 1.24E-12 |
| NM_145697    | <i>NUF2</i>     | 3.40 | 8.28E-09 | 4.81 | 3.22E-11 |
| NM_021186    | <i>ZP4</i>      | 3.49 | 1.03E-14 | 4.91 | 3.21E-17 |
| NM_016343    | <i>CENPF</i>    | 3.52 | 1.25E-09 | 2.85 | 7.88E-09 |
| NM_001790    | <i>CDC25C</i>   | 3.60 | 3.47E-08 | 3.67 | 1.06E-08 |
| NM_018131    | <i>CEP55</i>    | 3.63 | 4.13E-10 | 3.89 | 5.89E-11 |
| NM_016195    | <i>KIF20B</i>   | 3.68 | 4.08E-10 | 2.62 | 1.36E-08 |
| NM_014750    | <i>DLGAP5</i>   | 3.71 | 2.39E-12 | 4.17 | 1.87E-13 |
| NM_005192    | <i>CDKN3</i>    | 4.04 | 7.94E-08 | 4.03 | 3.28E-08 |
| NM_018365    | <i>MNS1</i>     | 4.09 | 5.55E-10 | 3.31 | 3.38E-09 |
| NM_012484    | <i>HMMR</i>     | 4.51 | 2.85E-12 | 5.25 | 1.87E-13 |
| NM_080672    | <i>PHACTR3</i>  | 4.53 | 8.83E-10 | 3.81 | 3.34E-09 |
| NM_001956    | <i>EDN2</i>     | 4.78 | 2.38E-09 | 4.67 | 1.19E-09 |
| NM_153046    | <i>TDRD9</i>    | 4.83 | 1.87E-12 | 4.59 | 1.08E-12 |
| NM_032935    | <i>MT4</i>      | 5.04 | 2.85E-12 | 5.54 | 4.26E-13 |
| BC004565     | <i>unknown</i>  | 5.05 | 1.16E-11 | 2.65 | 2.23E-08 |

**Table S3:** List of genes inversely deregulated between *CDKN2A* and *MC1R* analyses. Abbreviations: F.C: Fold Change; P-value: adjusted P-Value of such comparison; wt: wild-type.

| HGNC_symbol    | Ensembl_link    | mutant <i>CDKN2A</i> vs wt <i>CDKN2A</i><br>(both RHC <i>MC1R</i> ) |             | mutant <i>CDKN2A</i> vs wt <i>CDKN2A</i><br>(both wt <i>MC1R</i> ) |             | RHC <i>MC1R</i> vs wt <i>MC1R</i><br>(both mutant <i>CDKN2A</i> ) |             | RHC <i>MC1R</i> vs wt <i>MC1R</i><br>(both wt <i>CDKN2A</i> ) |             |
|----------------|-----------------|---------------------------------------------------------------------|-------------|--------------------------------------------------------------------|-------------|-------------------------------------------------------------------|-------------|---------------------------------------------------------------|-------------|
|                |                 | log F.C                                                             | adj.p.value | log F.C                                                            | adj.p.value | log F.C                                                           | adj.p.value | log F.C                                                       | adj.p.value |
| <i>XAF1</i>    | NM_017523       | 5.11                                                                | 1.98E-08    | 3.00                                                               | 9.40E-06    | -1.11                                                             | 0.041921124 | -3.22                                                         | 1.59E-06    |
| <i>MX2</i>     | NM_002463       | 4.14                                                                | 1.32E-11    | 1.06                                                               | 0.000133758 | -2.59                                                             | 2.72E-09    | -5.66                                                         | 4.69E-14    |
| <i>IFI44L</i>  | NM_006820       | 3.49                                                                | 6.99E-11    | 2.28                                                               | 1.49E-08    | -0.93                                                             | 0.000400236 | -2.14                                                         | 9.59E-09    |
| <i>IFIT3</i>   | NM_001549       | 3.26                                                                | 8.18E-09    | 1.26                                                               | 0.00036059  | -1.57                                                             | 3.37E-05    | -3.57                                                         | 5.21E-10    |
| <i>CAPN14</i>  | AK092257        | 3.25                                                                | 3.91E-05    | 2.20                                                               | 0.00113099  | -1.37                                                             | 0.032844763 | -2.42                                                         | 0.0002558   |
|                | AK023743        | 3.18                                                                | 1.52E-10    | 1.95                                                               | 7.56E-08    | -0.49                                                             | 0.039372674 | -1.71                                                         | 1.27E-07    |
| <i>IFI44</i>   | NM_006417       | 3.07                                                                | 3.28E-12    | 2.71                                                               | 7.74E-12    | -0.76                                                             | 5.31E-05    | -1.12                                                         | 2.60E-07    |
| <i>KRT19</i>   | NM_002276       | 2.86                                                                | 3.59E-10    | 0.81                                                               | 0.000744197 | -1.31                                                             | 4.49E-06    | -3.36                                                         | 8.78E-12    |
| <i>IFNK</i>    | NM_020124       | 2.74                                                                | 7.98E-07    | 2.36                                                               | 3.02E-06    | -1.04                                                             | 0.007725554 | -1.43                                                         | 0.000326988 |
| <i>IFI6</i>    | NM_022873       | 2.56                                                                | 3.45E-08    | 1.05                                                               | 0.000601236 | -0.79                                                             | 0.00606156  | -2.30                                                         | 2.96E-08    |
| <i>BTN3A3</i>  | NM_006994       | 2.42                                                                | 1.07E-05    | 1.55                                                               | 0.000669858 | -1.08                                                             | 0.011856791 | -1.95                                                         | 3.31E-05    |
| <i>LMO2</i>    | NM_005574       | 2.41                                                                | 1.43E-10    | 0.79                                                               | 1.00E-04    | -1.12                                                             | 1.67E-06    | -2.75                                                         | 5.51E-12    |
| <i>GBP3</i>    | NM_018284       | 2.40                                                                | 1.80E-07    | 2.10                                                               | 6.58E-07    | -0.70                                                             | 0.020231435 | -1.00                                                         | 0.000961856 |
| <i>RNF182</i>  | NM_152737       | 2.19                                                                | 1.05E-05    | 1.78                                                               | 5.97E-05    | -0.93                                                             | 0.015597153 | -1.33                                                         | 0.000585284 |
| <i>RHOBTB3</i> | NM_014899       | 2.17                                                                | 1.04E-05    | 1.01                                                               | 0.008209935 | -1.98                                                             | 1.59E-05    | -3.14                                                         | 2.33E-08    |
| <i>IFIT2</i>   | NM_001547       | 2.16                                                                | 4.68E-08    | 2.17                                                               | 3.56E-08    | -1.48                                                             | 3.08E-06    | -1.47                                                         | 1.46E-06    |
| <i>USP18</i>   | NM_017414       | 2.14                                                                | 1.55E-08    | 0.52                                                               | 0.018990885 | -0.69                                                             | 0.002714314 | -2.31                                                         | 1.21E-09    |
| <i>EPST11</i>  | NM_033255       | 2.12                                                                | 3.99E-05    | 1.77                                                               | 0.000160602 | -1.70                                                             | 0.0002321   | -2.05                                                         | 1.60E-05    |
|                | A_32_P53976     | 2.01                                                                | 3.17E-05    | 1.10                                                               | 0.005270514 | -0.86                                                             | 0.026819981 | -1.77                                                         | 3.55E-05    |
| <i>RSAD2</i>   | NM_080657       | 1.96                                                                | 0.001691807 | 1.44                                                               | 0.012103521 | -2.71                                                             | 4.60E-05    | -3.23                                                         | 2.96E-06    |
|                | AK023660        | 1.96                                                                | 4.65E-08    | 0.92                                                               | 0.000195518 | -0.81                                                             | 0.000669435 | -1.85                                                         | 2.23E-08    |
|                | THC2676635      | 1.93                                                                | 2.93E-08    | 1.27                                                               | 3.49E-06    | -0.86                                                             | 0.000221405 | -1.52                                                         | 1.43E-07    |
| <i>CLCA3</i>   | NM_004921       | 1.86                                                                | 8.41E-05    | 1.74                                                               | 9.87E-05    | -1.54                                                             | 0.000333218 | -1.65                                                         | 8.58E-05    |
| <i>PARP9</i>   | NM_031458       | 1.83                                                                | 2.21E-06    | 1.21                                                               | 0.000138412 | -0.63                                                             | 0.024137843 | -1.26                                                         | 4.46E-05    |
| <i>SCG5</i>    | NM_003020       | 1.83                                                                | 2.10E-08    | 2.37                                                               | 5.14E-10    | -1.87                                                             | 8.28E-09    | -1.32                                                         | 2.93E-07    |
| <i>HS3ST1</i>  | NM_005114       | 1.80                                                                | 2.00E-05    | 1.12                                                               | 0.001411596 | -1.00                                                             | 0.003458263 | -1.69                                                         | 1.14E-05    |
| <i>CEACAM1</i> | NM_001712       | 1.80                                                                | 1.35E-06    | 1.56                                                               | 4.49E-06    | -3.12                                                             | 6.03E-10    | -3.36                                                         | 7.97E-11    |
|                | NM_002534       | 1.76                                                                | 0.000121473 | 0.79                                                               | 0.039773363 | -1.04                                                             | 0.007622258 | -2.01                                                         | 7.90E-06    |
|                | L06175          | 1.75                                                                | 0.000889078 | 1.36                                                               | 0.004950943 | -1.82                                                             | 0.000403092 | -2.22                                                         | 2.73E-05    |
|                | AK124281        | 1.75                                                                | 5.68E-05    | 1.40                                                               | 0.00033138  | -0.90                                                             | 0.011971445 | -1.25                                                         | 0.000538014 |
| <i>C5orf56</i> | ENST00000378953 | 1.73                                                                | 0.000157045 | 0.84                                                               | 0.030463445 | -1.03                                                             | 0.008749111 | -1.93                                                         | 1.47E-05    |
| <i>CRNN</i>    | NM_016190       | 1.67                                                                | 0.000105303 | 1.13                                                               | 0.002501087 | -4.14                                                             | 8.50E-10    | -4.68                                                         | 5.89E-11    |

|                |              |      |             |      |             |       |             |       |             |
|----------------|--------------|------|-------------|------|-------------|-------|-------------|-------|-------------|
|                | AK025669     | 1.67 | 0.000315954 | 1.77 | 0.000112469 | -1.00 | 0.013197622 | -0.90 | 0.017900911 |
| <i>PADI1</i>   | NM_013358    | 1.66 | 0.000201315 | 1.12 | 0.004289502 | -3.61 | 1.08E-08    | -4.16 | 6.97E-10    |
|                | THC2640099   | 1.63 | 0.003962305 | 1.41 | 0.008167973 | -1.45 | 0.006843443 | -1.67 | 0.001407815 |
| <i>TNFSF10</i> | NM_003810    | 1.61 | 3.76E-05    | 1.04 | 0.001525958 | -1.37 | 0.000112711 | -1.93 | 1.06E-06    |
| <i>F3</i>      | NM_001993    | 1.56 | 0.007308907 | 1.28 | 0.019400875 | -1.14 | 0.039539591 | -1.42 | 0.007227404 |
| <i>IL15</i>    | NM_172174    | 1.55 | 5.30E-08    | 1.29 | 4.08E-07    | -0.82 | 5.92E-05    | -1.09 | 1.10E-06    |
| <i>SP110</i>   | NM_004510    | 1.53 | 1.66E-07    | 0.94 | 3.63E-05    | -0.67 | 0.000916414 | -1.26 | 4.53E-07    |
| <i>BST2</i>    | NM_004335    | 1.49 | 0.00349873  | 1.52 | 0.00211498  | -3.36 | 4.60E-07    | -3.33 | 2.09E-07    |
| <i>CLCA4</i>   | NM_012128    | 1.49 | 0.001612926 | 1.67 | 0.000362464 | -1.67 | 0.000354497 | -1.48 | 0.000637245 |
|                | BX090412     | 1.48 | 0.001281109 | 1.47 | 0.000930605 | -0.87 | 0.037340541 | -0.88 | 0.025448576 |
|                | BC045163     | 1.45 | 3.62E-05    | 0.58 | 0.040103551 | -1.39 | 3.12E-05    | -2.25 | 3.73E-08    |
| <i>HOXA10</i>  | NM_018951    | 1.43 | 4.44E-06    | 0.86 | 0.000579266 | -0.53 | 0.022134445 | -1.10 | 2.33E-05    |
| <i>TLR2</i>    | NM_003264    | 1.42 | 0.000310032 | 1.80 | 1.61E-05    | -2.33 | 7.17E-07    | -1.95 | 2.78E-06    |
|                | THC2657493   | 1.38 | 0.000134482 | 1.47 | 4.25E-05    | -2.16 | 4.46E-07    | -2.07 | 3.14E-07    |
| <i>OASL</i>    | NM_003733    | 1.34 | 1.66E-05    | 0.58 | 0.01676382  | -0.78 | 0.001967307 | -1.54 | 7.42E-07    |
|                | CR625594     | 1.34 | 0.000464881 | 1.05 | 0.002484941 | -0.70 | 0.03890031  | -0.98 | 0.002738176 |
| <i>PSCA</i>    | NM_005672    | 1.32 | 0.002415497 | 1.59 | 0.000301512 | -7.30 | 2.39E-12    | -7.02 | 1.20E-12    |
|                | A_24_P476718 | 1.31 | 0.000870782 | 2.24 | 1.89E-06    | -1.93 | 9.86E-06    | -1.00 | 0.00360047  |
| <i>SPINK1</i>  | NM_003122    | 1.29 | 0.005034924 | 0.96 | 0.024954425 | -3.40 | 1.10E-07    | -3.73 | 1.34E-08    |
|                | CR612518     | 1.28 | 0.006785661 | 1.14 | 0.011308172 | -0.96 | 0.032090928 | -1.11 | 0.009489293 |
|                | A_32_P169353 | 1.20 | 0.045002273 | 1.48 | 0.010727271 | -2.84 | 2.98E-05    | -2.56 | 4.67E-05    |
|                | BC062324     | 1.19 | 0.01579769  | 1.22 | 0.010153956 | -1.67 | 0.00082046  | -1.64 | 0.000563989 |
| <i>DHX58</i>   | NM_024119    | 1.18 | 5.99E-06    | 0.71 | 0.000741093 | -0.68 | 0.001151375 | -1.15 | 2.09E-06    |
|                | BM989848     | 1.16 | 0.011329228 | 0.98 | 0.023865075 | -0.89 | 0.042562201 | -1.07 | 0.010191815 |
| <i>MDK</i>     | NM_001012334 | 1.16 | 6.19E-05    | 1.20 | 2.48E-05    | -1.55 | 1.14E-06    | -1.51 | 7.03E-07    |
| <i>S100A4</i>  | NM_002961    | 1.12 | 0.000446466 | 0.72 | 0.010561535 | -0.77 | 0.007225432 | -1.17 | 0.000100805 |
| <i>BTN3A2</i>  | NM_007047    | 1.09 | 1.77E-05    | 1.11 | 9.31E-06    | -0.57 | 0.00559599  | -0.55 | 0.004476681 |
| <i>ALDH1L1</i> | NM_012190    | 1.09 | 0.006504537 | 1.35 | 0.000801896 | -1.46 | 0.000386161 | -1.20 | 0.001386589 |
| <i>SEPP1</i>   | NM_005410    | 1.08 | 0.017795719 | 2.85 | 1.26E-06    | -2.78 | 1.49E-06    | -1.00 | 0.01532286  |
|                | THC2671679   | 1.07 | 3.76E-05    | 0.73 | 0.001017835 | -1.24 | 3.55E-06    | -1.58 | 7.50E-08    |
| <i>HCP5</i>    | NM_006674    | 1.06 | 0.007759651 | 1.33 | 0.000898615 | -1.84 | 3.33E-05    | -1.57 | 9.87E-05    |
|                | AK026517     | 1.05 | 0.002902491 | 1.06 | 0.001900336 | -0.80 | 0.015527585 | -0.79 | 0.011579443 |
|                | THC2754005   | 1.02 | 0.000456872 | 1.29 | 2.63E-05    | -1.03 | 0.000244525 | -0.77 | 0.002241279 |
| <i>ITGA2</i>   | NM_002203    | 1.01 | 0.022552265 | 0.94 | 0.026376749 | -1.06 | 0.012631859 | -1.13 | 0.005479826 |
| <i>WNT7A</i>   | NM_004625    | 0.99 | 0.000464881 | 0.53 | 0.033957447 | -1.77 | 4.27E-07    | -2.24 | 8.20E-09    |

|                 |             |      |             |      |             |       |             |       |             |
|-----------------|-------------|------|-------------|------|-------------|-------|-------------|-------|-------------|
| <i>NEBL</i>     | NM_006393   | 0.99 | 3.91E-05    | 0.73 | 0.000558386 | -0.52 | 0.008729268 | -0.78 | 0.000141682 |
| <i>PLAT</i>     | NM_000930   | 0.98 | 0.000875467 | 1.35 | 2.25E-05    | -2.14 | 8.14E-08    | -1.77 | 3.78E-07    |
| <i>EIF2AK2</i>  | NM_002759   | 0.98 | 0.020075442 | 1.52 | 0.000512242 | -1.38 | 0.001188256 | -0.84 | 0.027870165 |
|                 | AF086052    | 0.98 | 0.009230344 | 1.53 | 0.000138634 | -1.38 | 0.000353702 | -0.83 | 0.013843783 |
| <i>ALDH1A3</i>  | NM_000693   | 0.96 | 0.000531565 | 0.60 | 0.014677759 | -1.10 | 8.25E-05    | -1.46 | 1.54E-06    |
|                 | BC056662    | 0.96 | 0.014386956 | 1.04 | 0.006439966 | -1.04 | 0.006569774 | -0.96 | 0.007518063 |
| <i>FMO2</i>     | NM_001460   | 0.96 | 0.037434212 | 2.94 | 1.09E-06    | -3.92 | 2.36E-08    | -1.94 | 5.37E-05    |
|                 | A_32_P35031 | 0.95 | 0.000214111 | 0.62 | 0.005152449 | -0.59 | 0.00820823  | -0.91 | 0.000104052 |
|                 | K03200      | 0.93 | 0.005429992 | 0.89 | 0.005220606 | -1.51 | 3.96E-05    | -1.55 | 1.55E-05    |
|                 | AK130514    | 0.91 | 0.017250913 | 0.93 | 0.011913737 | -1.39 | 0.000462002 | -1.38 | 0.00028677  |
| <i>ZSCAN4</i>   | NM_152677   | 0.90 | 0.014937773 | 1.41 | 0.000279708 | -1.54 | 0.000105108 | -1.03 | 0.002697114 |
| <i>APOL6</i>    | NM_030641   | 0.89 | 0.018487069 | 1.35 | 0.000505697 | -1.98 | 8.89E-06    | -1.51 | 9.06E-05    |
| <i>STS</i>      | NM_000351   | 0.87 | 0.014650689 | 1.50 | 0.000108672 | -2.58 | 1.92E-07    | -1.95 | 2.61E-06    |
|                 | THC2543120  | 0.86 | 0.009788415 | 1.06 | 0.001361535 | -0.83 | 0.009051891 | -0.63 | 0.035366686 |
| <i>PPARG</i>    | NM_138711   | 0.86 | 0.001039611 | 1.19 | 2.54E-05    | -0.84 | 0.000819453 | -0.50 | 0.023893587 |
| <i>IFITM1</i>   | NM_003641   | 0.85 | 0.002663548 | 0.62 | 0.018223872 | -0.67 | 0.012012196 | -0.90 | 0.000693909 |
|                 | CA314451    | 0.84 | 0.016043784 | 0.89 | 0.00853883  | -1.83 | 9.45E-06    | -1.79 | 6.00E-06    |
|                 | THC2551769  | 0.84 | 0.004358863 | 0.73 | 0.008331505 | -0.69 | 0.012821531 | -0.79 | 0.003004577 |
| <i>ENC1</i>     | NM_003633   | 0.83 | 0.002044084 | 1.05 | 0.000153929 | -1.96 | 1.05E-07    | -1.74 | 2.01E-07    |
| <i>KCNN4</i>    | NM_002250   | 0.82 | 0.006830609 | 1.03 | 0.000785576 | -1.34 | 5.13E-05    | -1.14 | 0.000158723 |
| <i>SPINK5</i>   | NM_006846   | 0.76 | 0.001825778 | 0.47 | 0.033705902 | -0.70 | 0.002501485 | -0.99 | 5.08E-05    |
| <i>MSMB</i>     | NM_002443   | 0.73 | 0.000832073 | 1.96 | 6.81E-09    | -5.28 | 1.03E-14    | -4.05 | 1.47E-13    |
| <i>PARP12</i>   | NM_022750   | 0.73 | 0.001230432 | 0.63 | 0.002667999 | -1.18 | 4.95E-06    | -1.27 | 8.66E-07    |
|                 | THC2545454  | 0.71 | 0.02260588  | 0.95 | 0.002276893 | -0.95 | 0.002311169 | -0.71 | 0.012721232 |
| <i>LYN</i>      | NM_002350   | 0.71 | 0.003114957 | 1.27 | 7.07E-06    | -1.32 | 3.92E-06    | -0.76 | 0.000708175 |
|                 | AK022020    | 0.71 | 0.004745127 | 0.59 | 0.012998879 | -1.12 | 4.23E-05    | -1.25 | 6.53E-06    |
| <i>LAYN</i>     | NM_178834   | 0.71 | 0.01514181  | 1.04 | 0.000500006 | -1.28 | 5.82E-05    | -0.95 | 0.000706483 |
| <i>PPP1R12B</i> | NM_032105   | 0.68 | 0.009014906 | 0.68 | 0.00660204  | -0.86 | 0.00096841  | -0.86 | 0.000563989 |
| <i>ATP1B1</i>   | NM_001677   | 0.67 | 0.040190654 | 0.78 | 0.013887884 | -0.84 | 0.008541899 | -0.73 | 0.014330567 |
| <i>CAMK2G</i>   | NM_172171   | 0.66 | 0.009630083 | 0.77 | 0.001946373 | -0.83 | 0.001095948 | -0.71 | 0.002542575 |
|                 | AK023696    | 0.64 | 0.030845413 | 0.63 | 0.025358095 | -0.64 | 0.025179173 | -0.64 | 0.017239992 |
| <i>TMEM132A</i> | NM_017870   | 0.60 | 0.015740285 | 0.64 | 0.007383258 | -1.72 | 3.16E-07    | -1.68 | 1.76E-07    |
| <i>TRIM2</i>    | NM_015271   | 0.59 | 0.004377494 | 0.42 | 0.029710532 | -0.50 | 0.009901857 | -0.67 | 0.000579911 |
| <i>LRAT</i>     | NM_004744   | 0.51 | 0.043998571 | 0.78 | 0.00198053  | -1.46 | 2.88E-06    | -1.19 | 1.50E-05    |
| <i>CCNDBP1</i>  | NM_037370   | 0.48 | 0.009949949 | 0.67 | 0.00049834  | -0.61 | 0.001068743 | -0.43 | 0.01171219  |



|               |              |       |             |       |             |       |             |       |             |
|---------------|--------------|-------|-------------|-------|-------------|-------|-------------|-------|-------------|
| <i>SMAD3</i>  | U68019       | 0.45  | 0.047091148 | 0.52  | 0.017762701 | -0.74 | 0.001205253 | -0.68 | 0.001635126 |
| <i>TMEM51</i> | NM_018022    | 0.45  | 0.028015892 | 0.43  | 0.029372403 | -0.56 | 0.005094908 | -0.58 | 0.002388652 |
|               | AK025166     | 0.39  | 0.028250766 | 0.37  | 0.030166685 | -0.45 | 0.008515843 | -0.47 | 0.004029612 |
| <i>NPEPPS</i> | NM_006310    | 0.38  | 0.044356931 | 0.45  | 0.014074734 | -0.79 | 0.000114668 | -0.72 | 0.000155666 |
| <i>ALG9</i>   | NM_001077691 | -0.31 | 0.031798838 | -0.29 | 0.034627663 | 0.28  | 0.044702714 | 0.30  | 0.023463075 |
|               | BC002724     | -0.42 | 0.014772148 | -0.81 | 3.29E-05    | 0.93  | 6.18E-06    | 0.54  | 0.000991685 |
| <i>MPP1</i>   | NM_002436    | -0.42 | 0.047666353 | -0.78 | 0.000483518 | 1.51  | 2.71E-07    | 1.16  | 3.00E-06    |
| <i>MYO19</i>  | NM_001033580 | -0.43 | 0.026532957 | -1.00 | 1.21E-05    | 0.98  | 1.38E-05    | 0.41  | 0.02114696  |
| <i>FANCC</i>  | NM_000136    | -0.51 | 0.011609739 | -0.47 | 0.014584719 | 0.48  | 0.012959276 | 0.52  | 0.004986322 |
| <i>OVOL2</i>  | NM_021220    | -0.52 | 0.001084197 | -0.39 | 0.007292061 | 0.47  | 0.001844654 | 0.60  | 0.000100716 |
| <i>SIN3B</i>  | BC025026     | -0.57 | 0.011569948 | -0.75 | 0.00103124  | 1.01  | 5.47E-05    | 0.83  | 0.000227367 |
| <i>CDT1</i>   | NM_030928    | -0.58 | 0.019198248 | -0.90 | 0.000479465 | 1.44  | 2.66E-06    | 1.13  | 2.30E-05    |
| <i>PON3</i>   | NM_000940    | -0.62 | 0.005105333 | -0.84 | 0.000276722 | 0.93  | 8.48E-05    | 0.72  | 0.000647845 |
| <i>ADRB2</i>  | NM_000024    | -0.63 | 0.001524882 | -0.73 | 0.000236914 | 0.59  | 0.001792781 | 0.48  | 0.005629305 |
| <i>PLK1</i>   | NM_005030    | -0.63 | 0.042808398 | -0.63 | 0.034901844 | 2.40  | 8.38E-08    | 2.41  | 3.33E-08    |
|               | CR611847     | -0.66 | 0.000634076 | -0.51 | 0.003687258 | 0.35  | 0.044627807 | 0.50  | 0.002990718 |
|               | A_23_P216071 | -0.70 | 0.00958912  | -0.58 | 0.022202131 | 0.54  | 0.033583338 | 0.66  | 0.00706467  |
| <i>CTSK</i>   | NM_000396    | -0.74 | 7.83E-05    | -1.81 | 1.05E-09    | 1.64  | 2.75E-09    | 0.58  | 0.000331696 |
| <i>ASF1B</i>  | NM_018154    | -0.76 | 0.048590758 | -0.83 | 0.022912812 | 1.00  | 0.007299284 | 0.92  | 0.008832468 |
| <i>NMNAT3</i> | NM_178177    | -0.76 | 0.000552736 | -0.87 | 9.23E-05    | 0.76  | 0.000345671 | 0.65  | 0.000881113 |
| <i>REEP2</i>  | NM_016606    | -0.78 | 0.005759911 | -0.93 | 0.001039901 | 1.69  | 1.66E-06    | 1.54  | 2.21E-06    |
| <i>ABCF2</i>  | NM_007189    | -0.80 | 0.000944624 | -0.74 | 0.001305162 | 0.60  | 0.00667932  | 0.66  | 0.001912744 |
| <i>LMCD1</i>  | NM_014583    | -0.95 | 0.002645754 | -0.76 | 0.010312363 | 0.74  | 0.012418953 | 0.93  | 0.001307708 |
| <i>NRP2</i>   | NM_201264    | -0.97 | 0.002390052 | -0.63 | 0.031835409 | 1.17  | 0.000297324 | 1.51  | 9.74E-06    |
| <i>ST7OT1</i> | NR_002330    | -0.99 | 0.000144723 | -0.44 | 0.048099669 | 0.80  | 0.00068922  | 1.36  | 1.07E-06    |
| <i>PKMYT1</i> | NM_182687    | -0.99 | 0.001983455 | -0.74 | 0.012491031 | 1.23  | 0.000180492 | 1.48  | 1.20E-05    |
| <i>CPT1C</i>  | NM_152359    | -1.08 | 1.08E-05    | -1.48 | 1.50E-07    | 0.94  | 2.56E-05    | 0.54  | 0.003391166 |
| <i>BEX5</i>   | NM_001012978 | -1.26 | 0.001348714 | -0.76 | 0.032521061 | 2.00  | 7.09E-06    | 2.50  | 2.08E-07    |
| <i>DHRS13</i> | NM_144683    | -1.45 | 0.00088615  | -1.72 | 0.000114616 | 1.32  | 0.001366222 | 1.05  | 0.005333513 |
| <i>CLDN17</i> | NM_012131    | -1.47 | 4.17E-05    | -1.79 | 2.57E-06    | 1.34  | 6.23E-05    | 1.01  | 0.000593411 |
| <i>STAC</i>   | NM_003149    | -1.57 | 0.001093743 | -1.23 | 0.005257075 | 0.88  | 0.043609023 | 1.22  | 0.003788264 |
|               | AK074473     | -1.83 | 6.09E-06    | -2.43 | 1.29E-07    | 1.71  | 7.39E-06    | 1.11  | 0.000405428 |
|               | CR602075     | -2.00 | 0.007381353 | -1.87 | 0.008773947 | 1.59  | 0.024722861 | 1.73  | 0.010382231 |
| <i>CD248</i>  | NM_020404    | -2.04 | 2.85E-05    | -1.14 | 0.004130168 | 0.77  | 0.049370648 | 1.67  | 7.16E-05    |
